# Supplementary material for: Mitochondrial genome copy number measured by DNA sequencing in human blood is strongly associated with metabolic traits via cell-type composition differences
Source: bioRxiv or medRxiv preprint supplement (doi:10.1101/2020.10.23.20218586), 2021-02-12

# S1 Fig

## Insulin Association Signal at chr1 NumtS

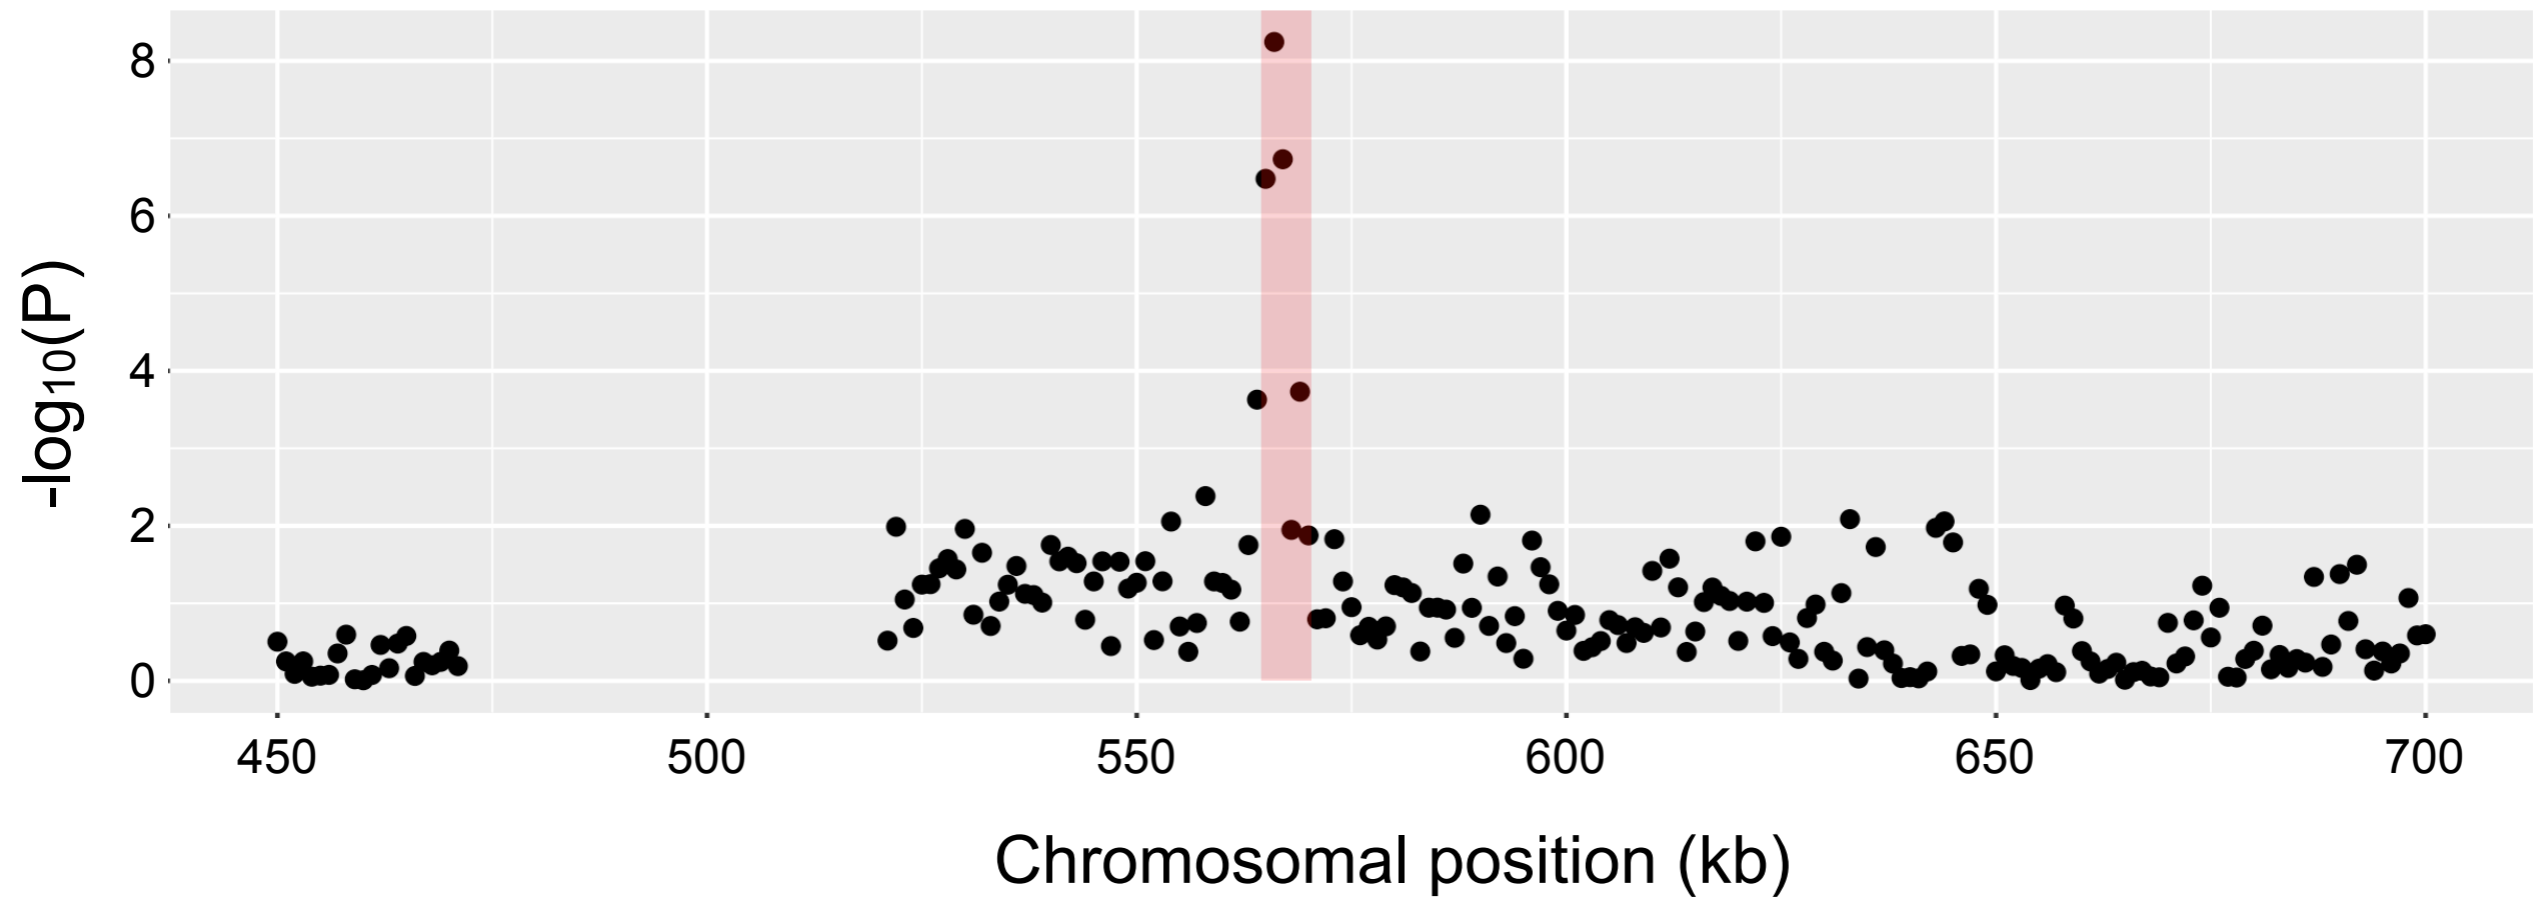

Gap Locations

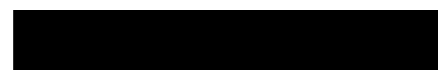

Human NumtS

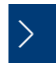

# S2 Fig

**a**

Association test with MT-CN in WES

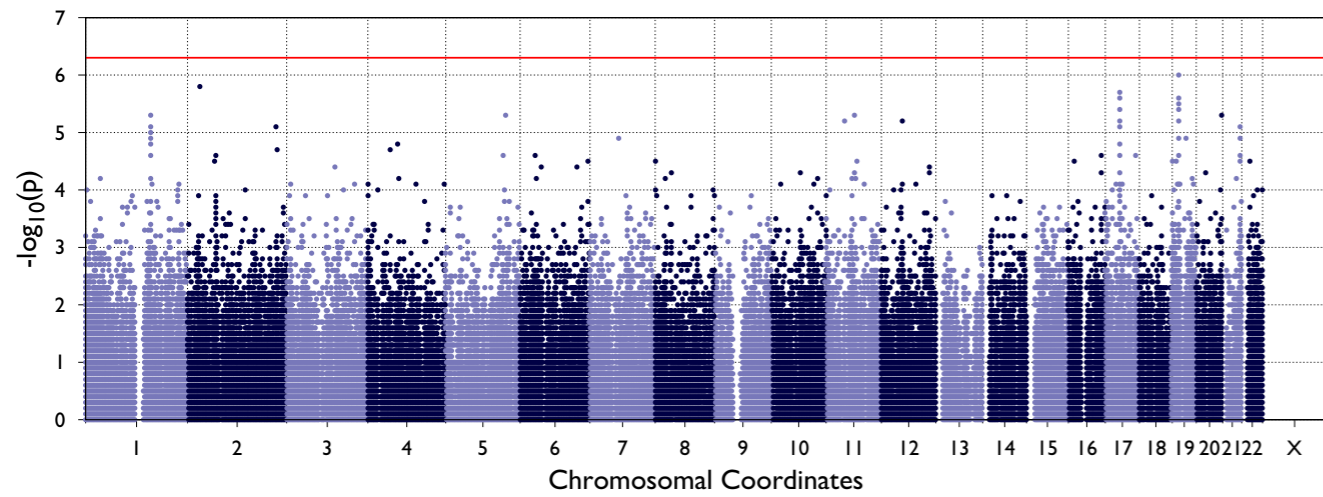**b**

Association test with MT-CN in WGS

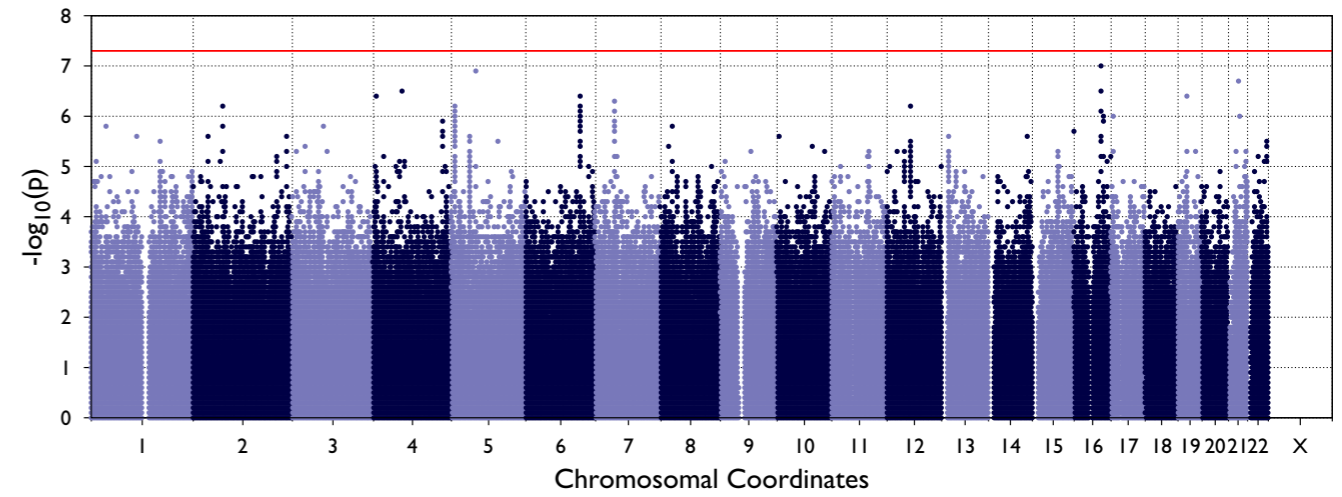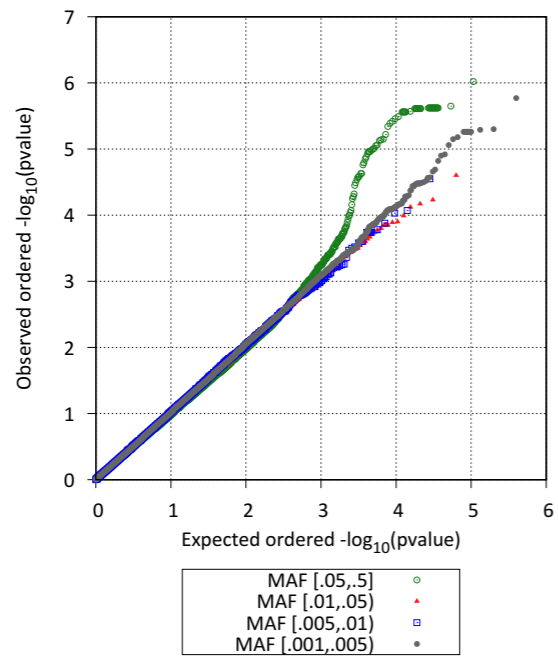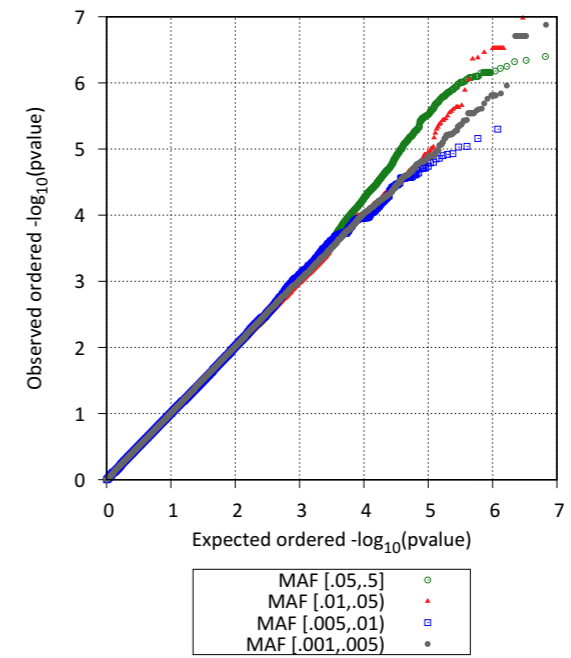

# S3 Fig

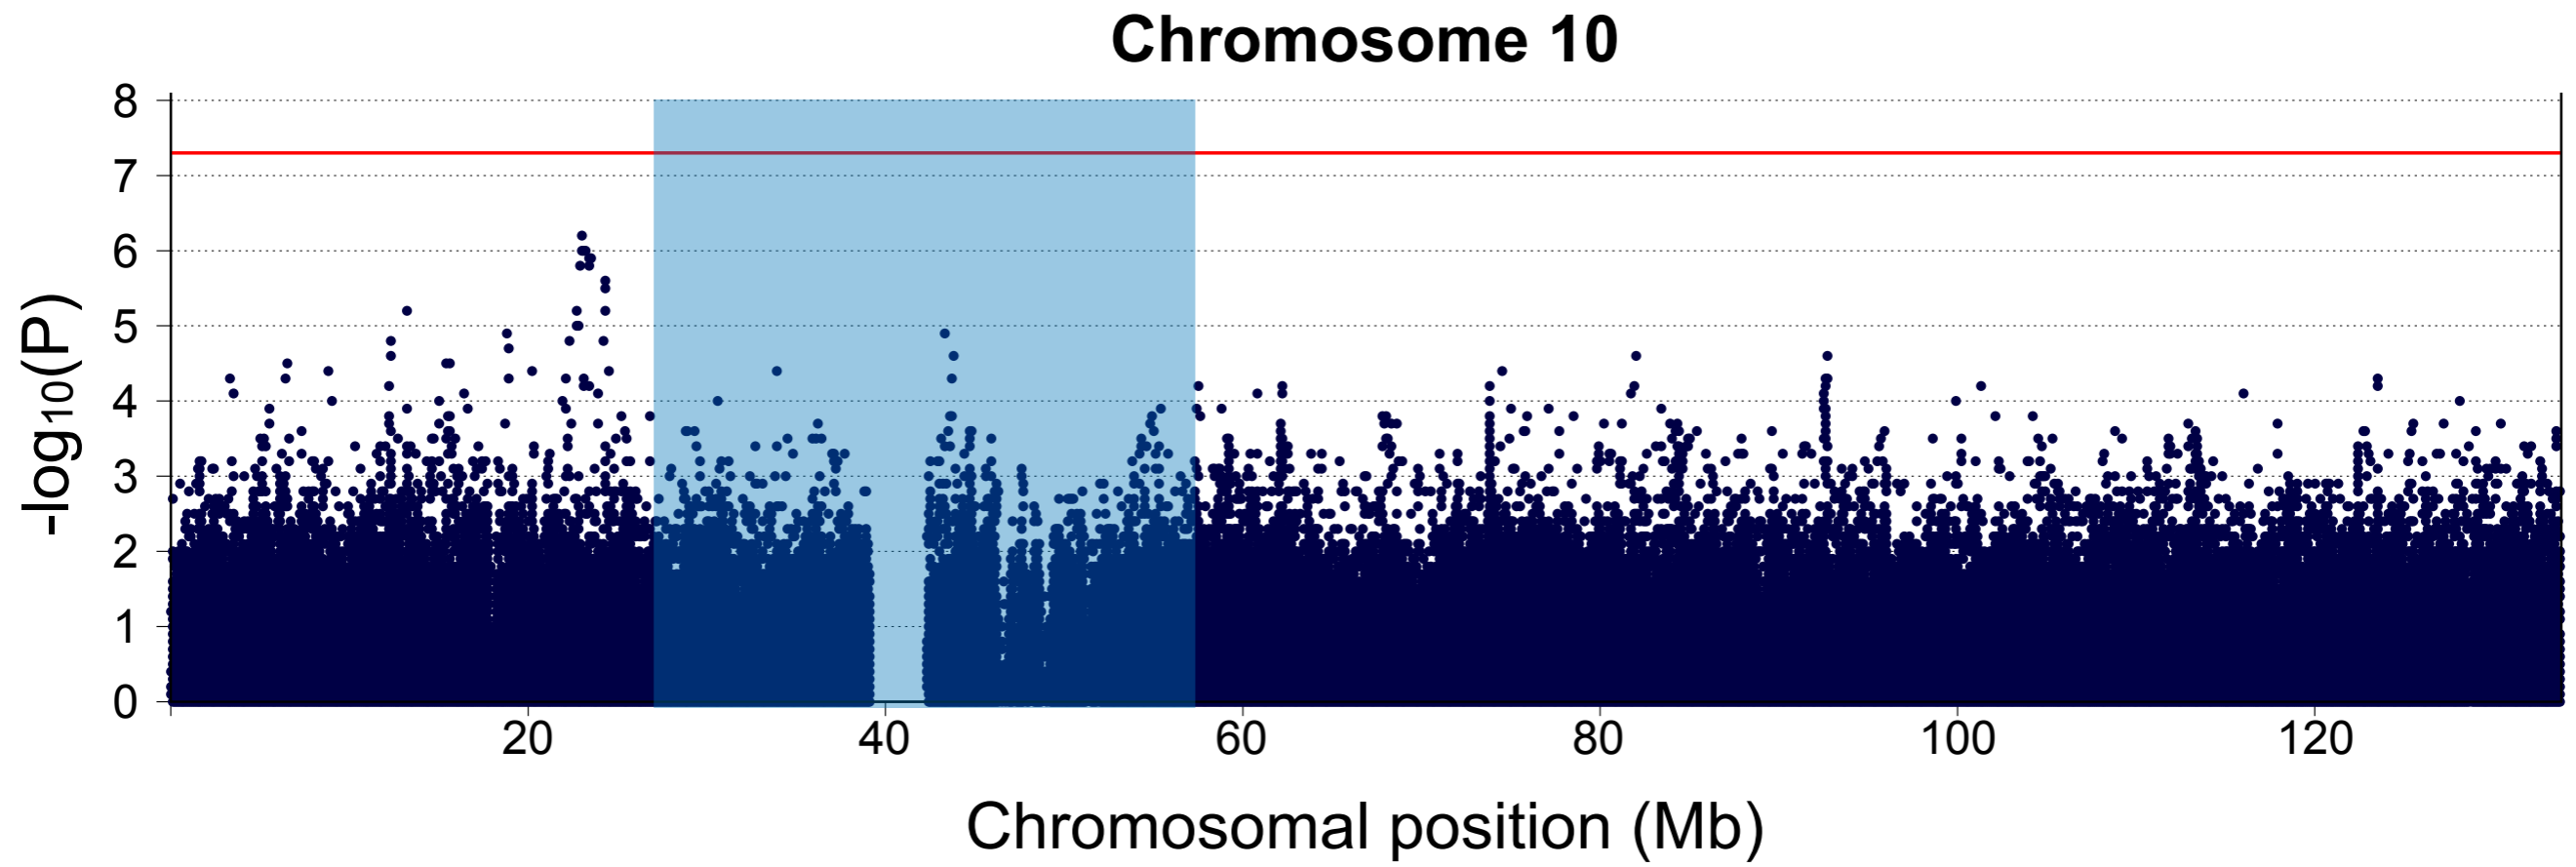

# S4 Fig

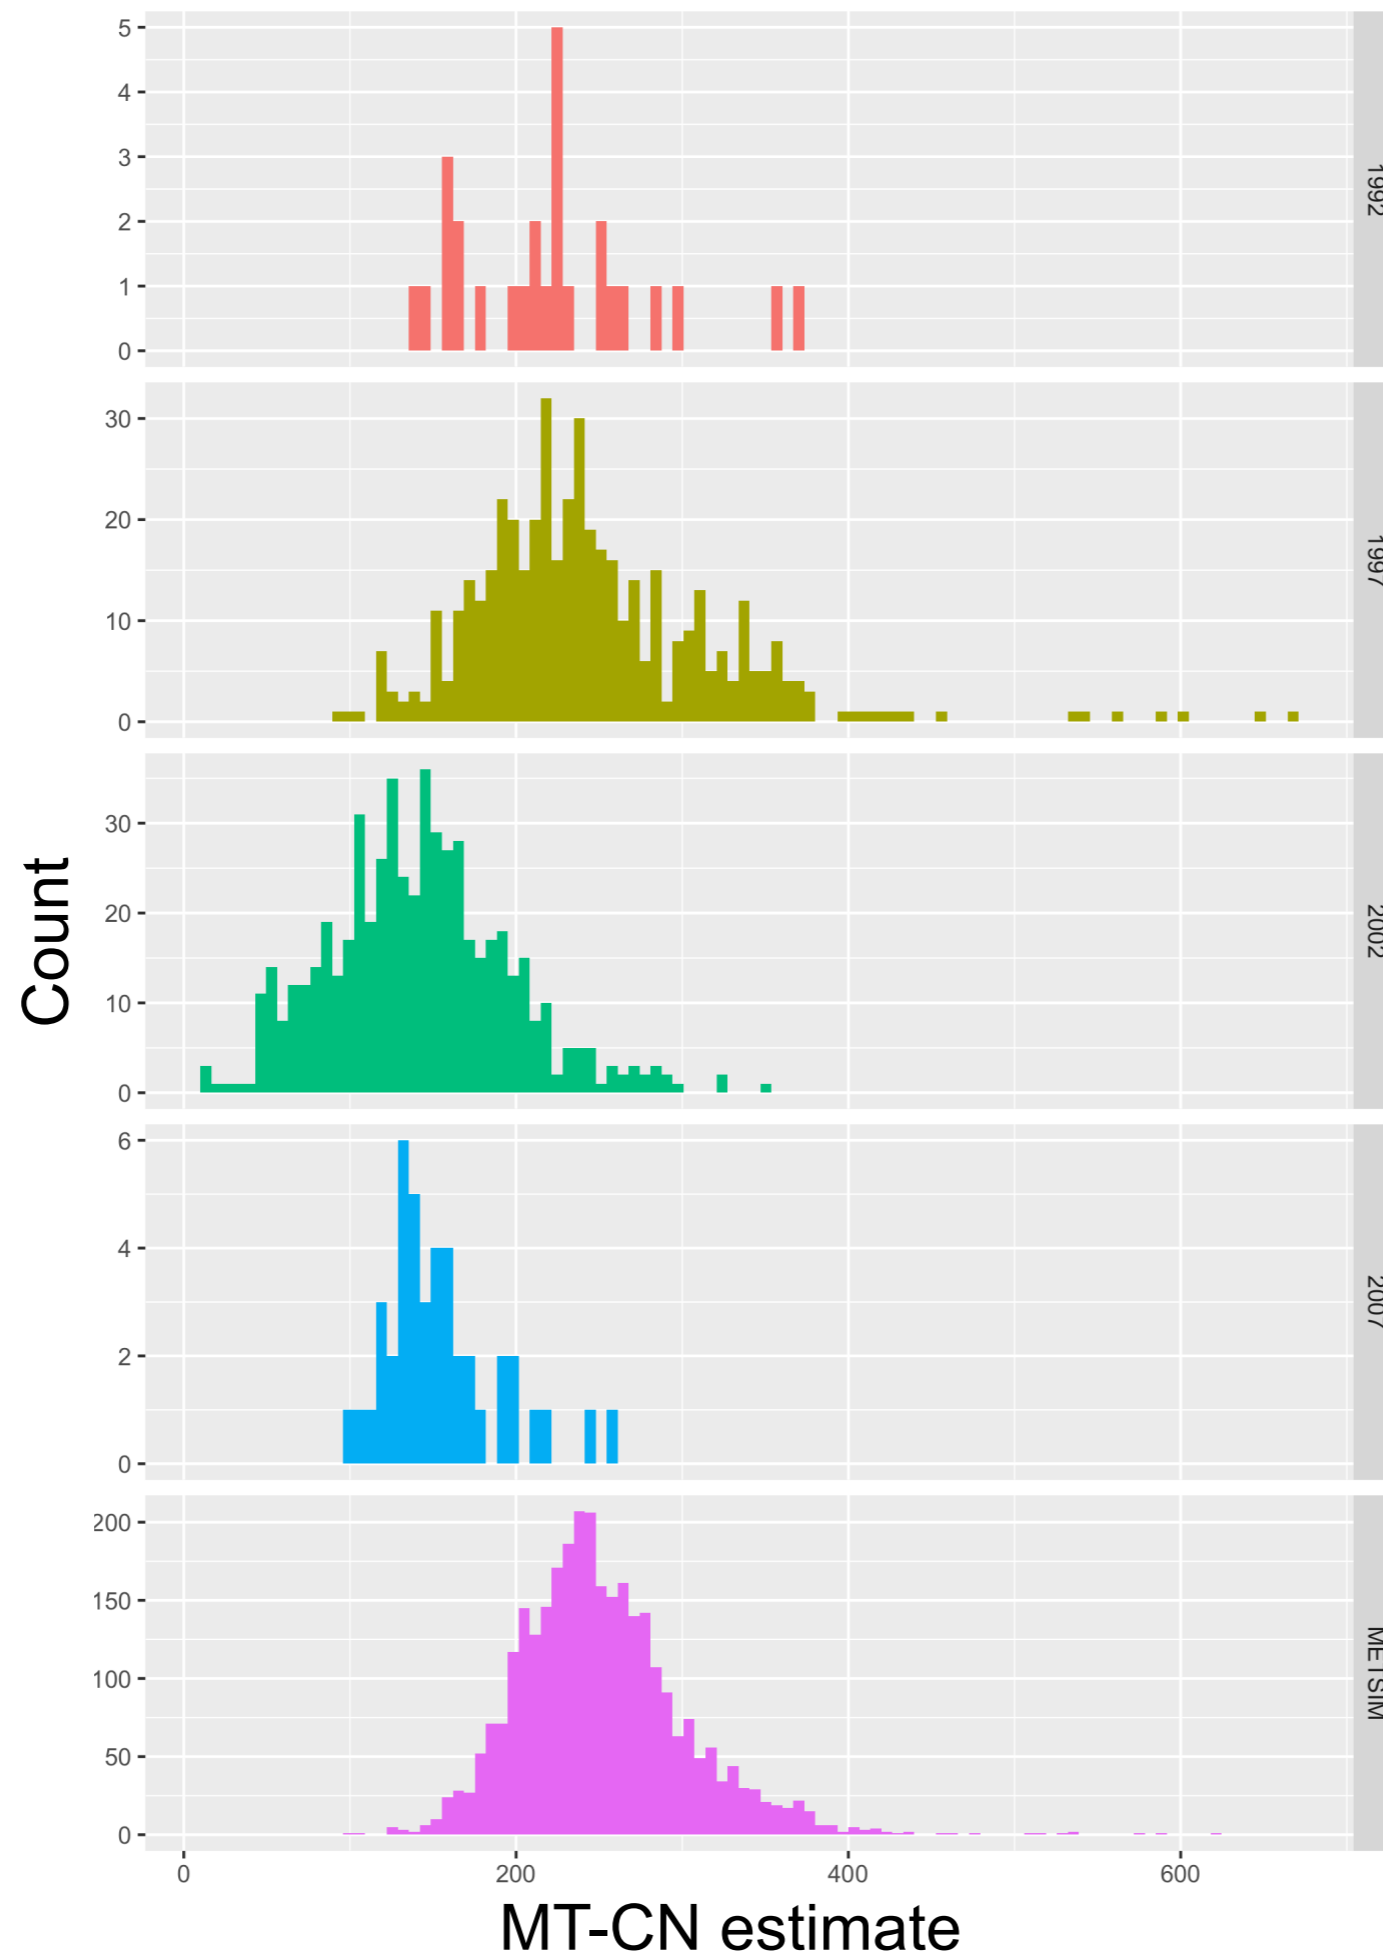

# S5 Fig

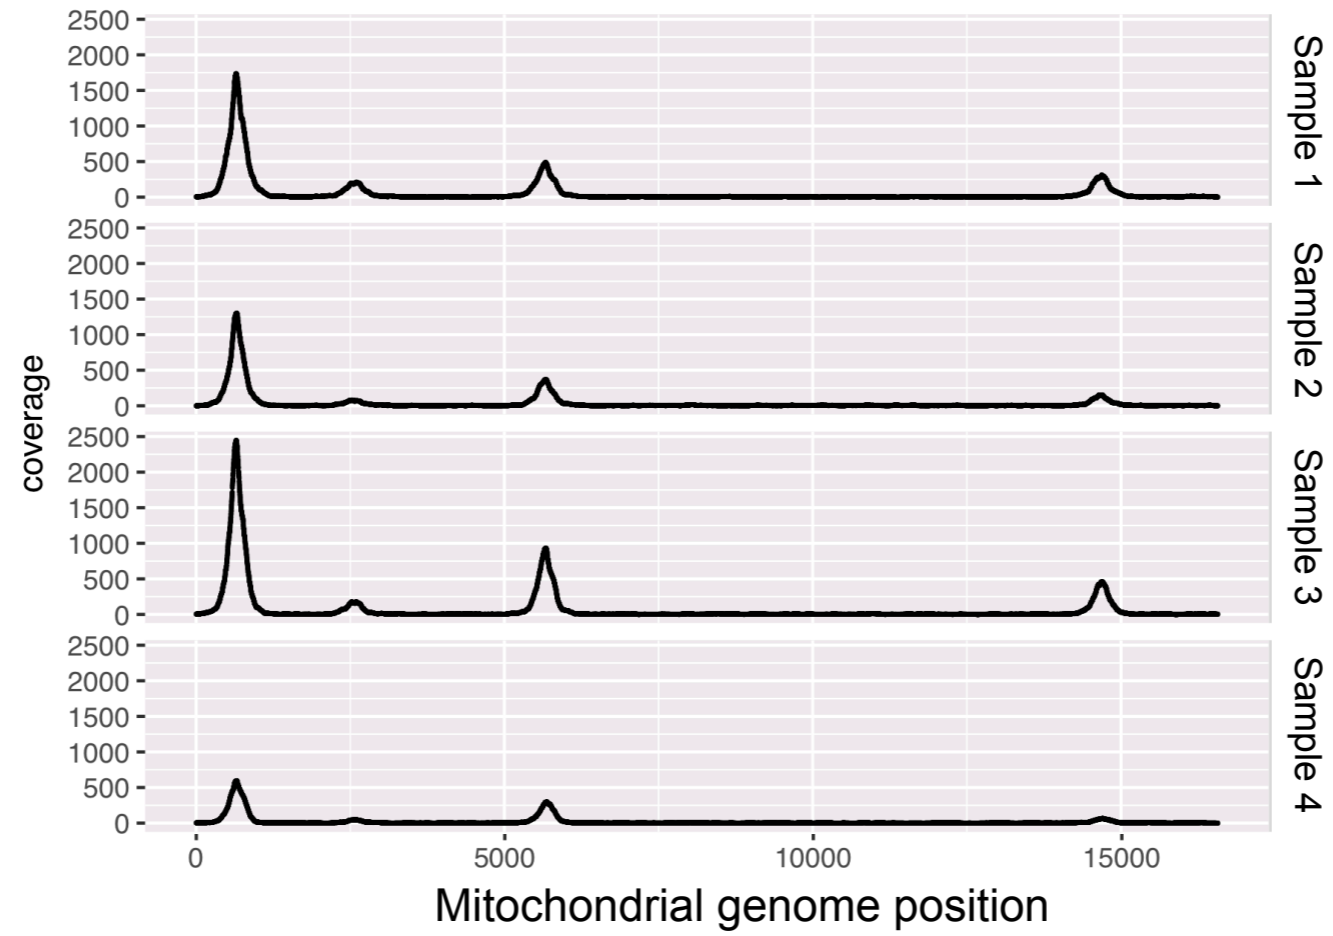

# S6 Fig

**a**

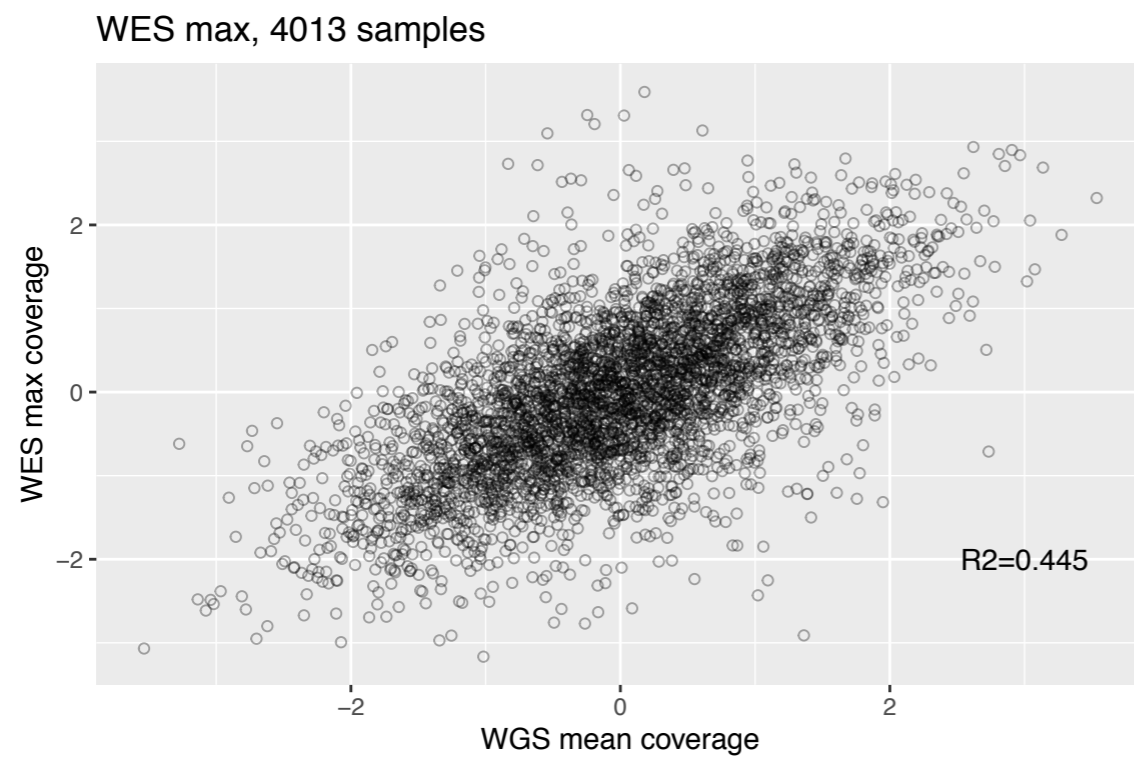

**b**

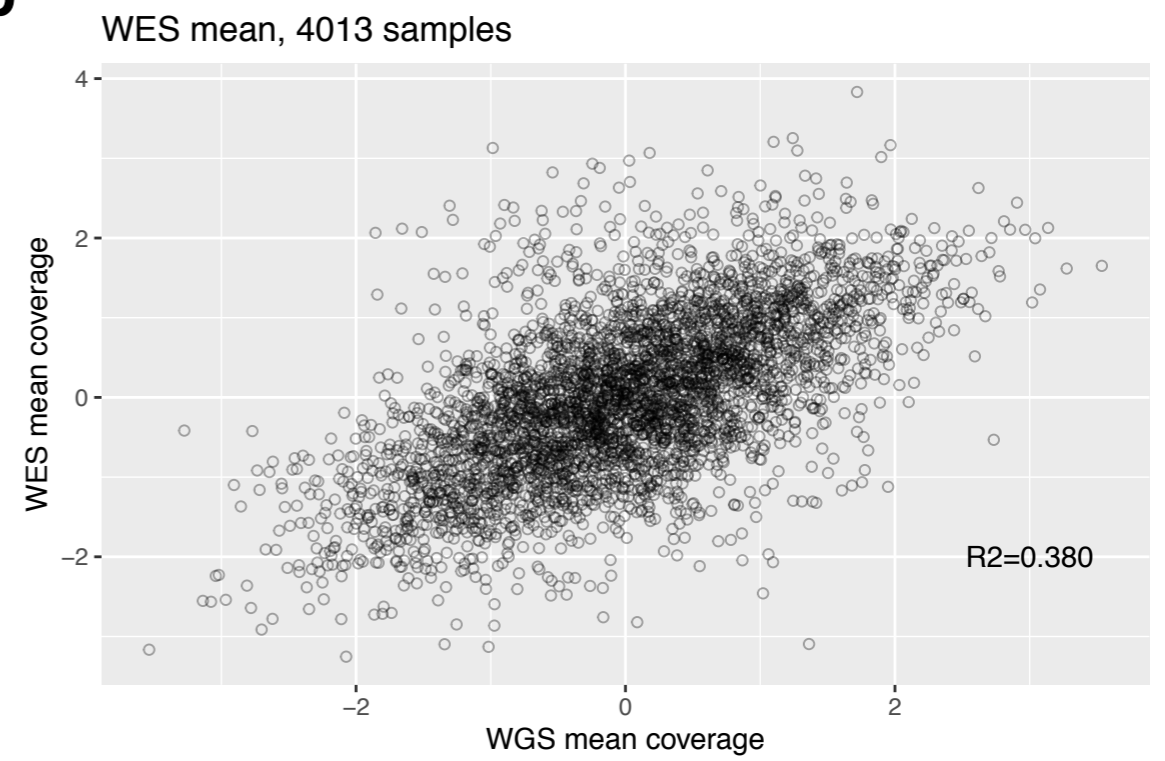

# S7 Fig

**a** L1 Penalty, Marginal Trait P Values

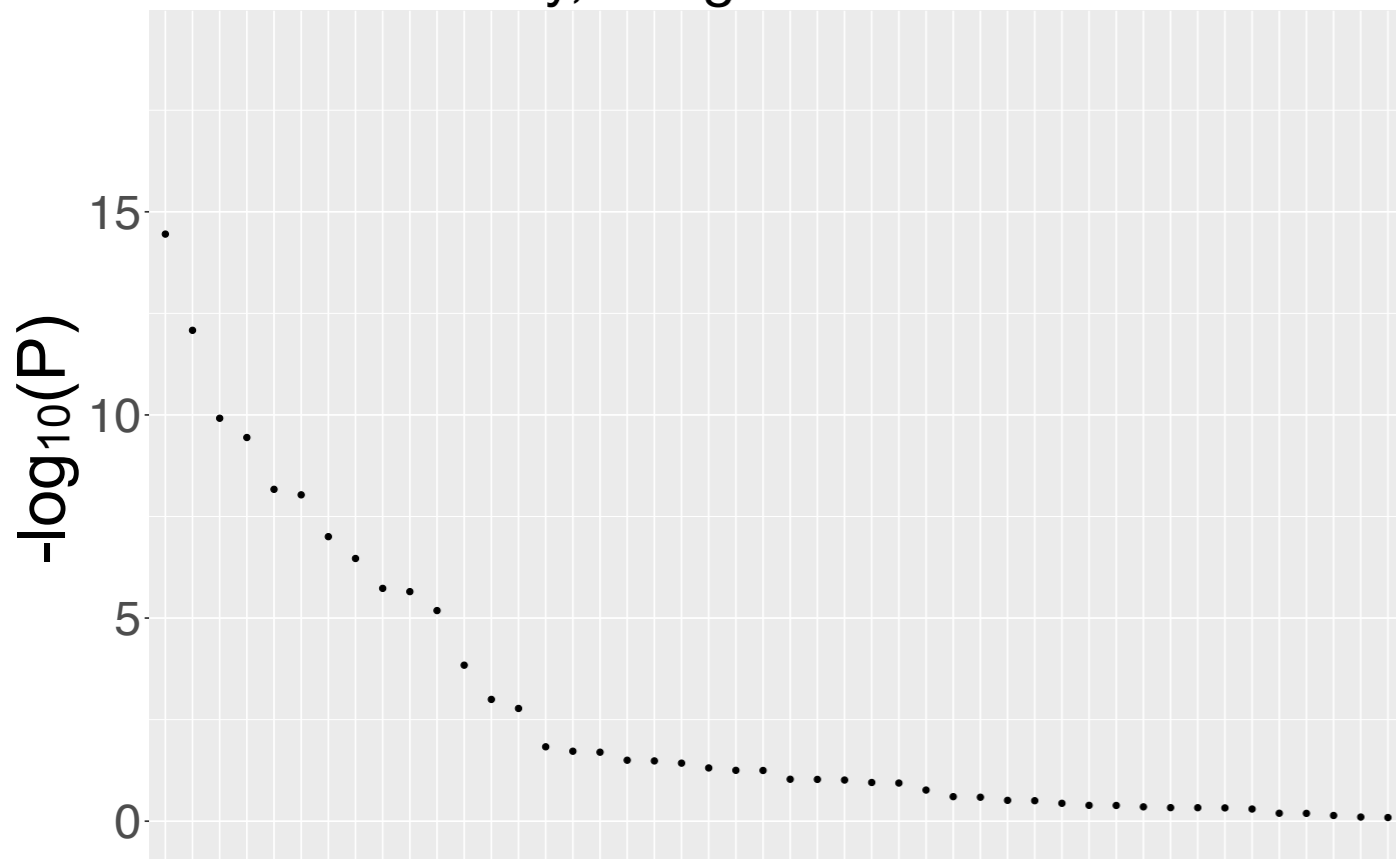

**b** L1 Penalty, Multiple Regression Trait P Values

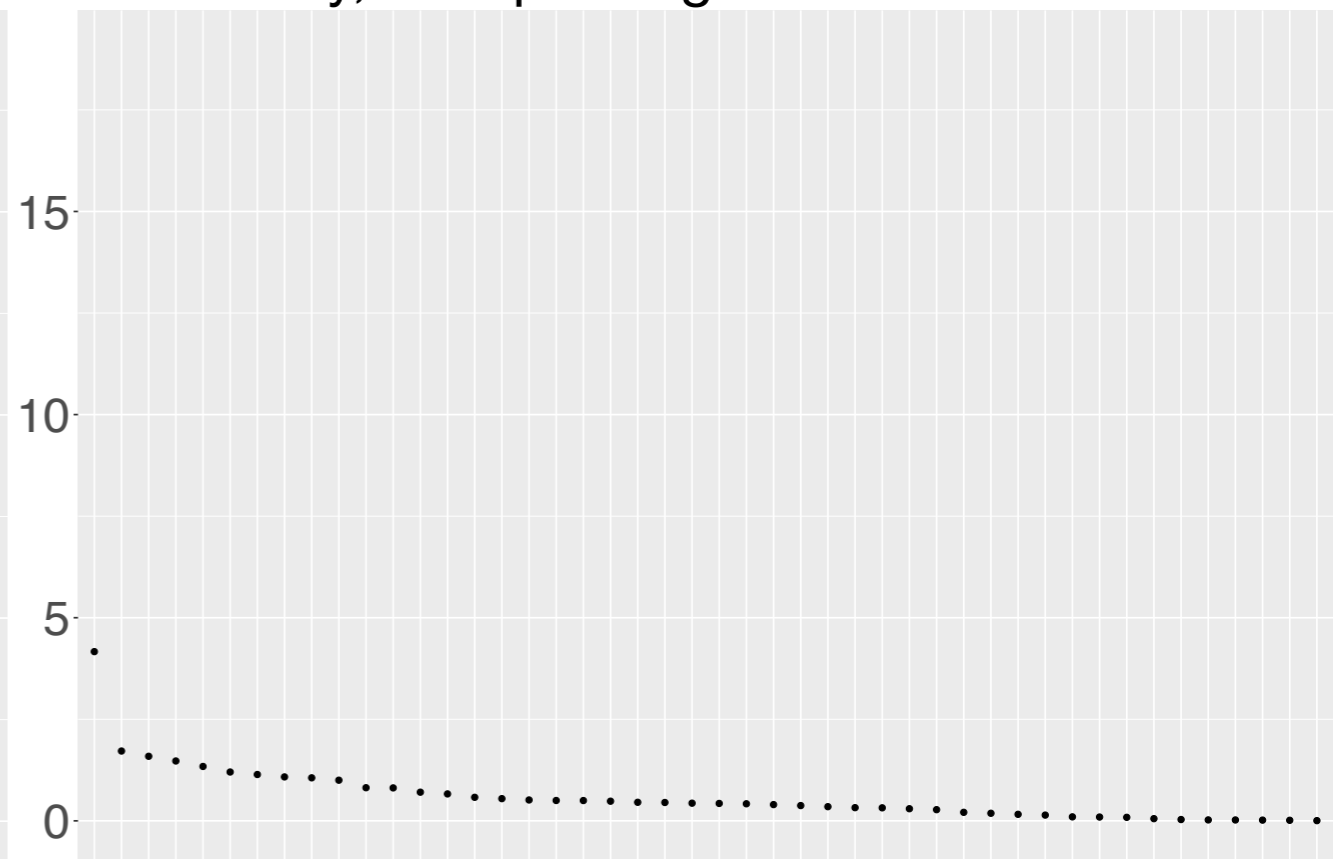

**c** L2 Penalty, Marginal Trait P Values

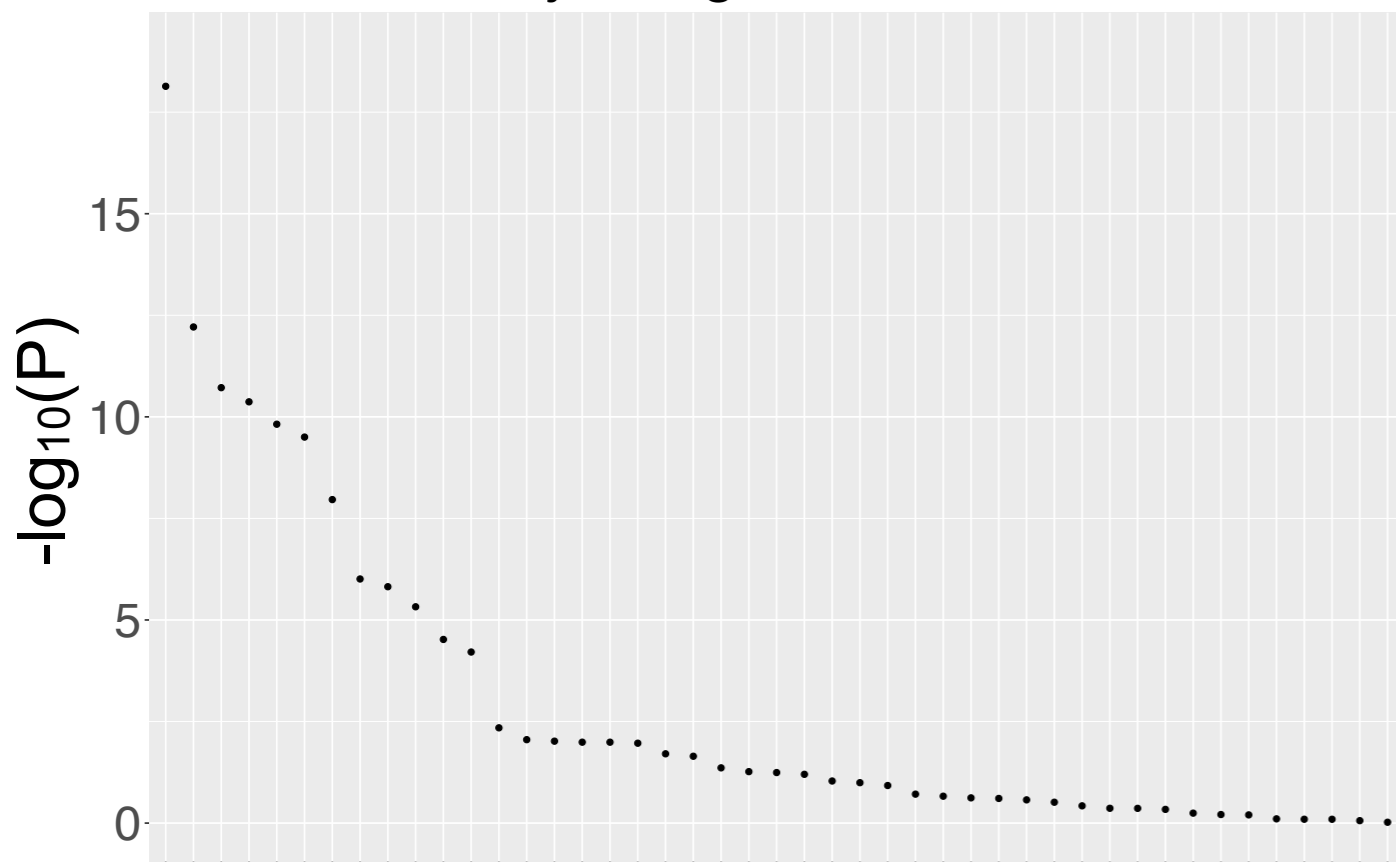

**d** L2 Penalty, Multiple Regression Trait P Values

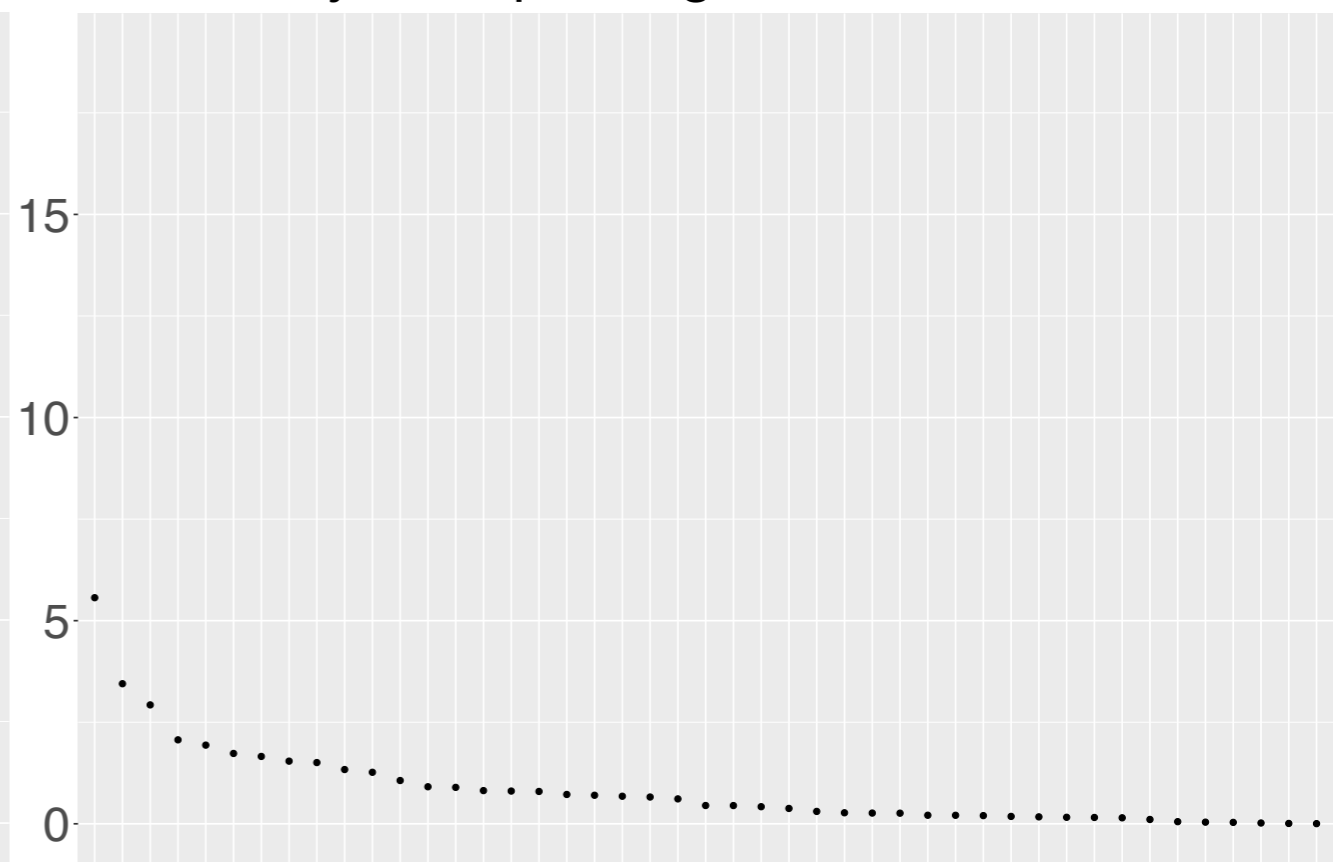

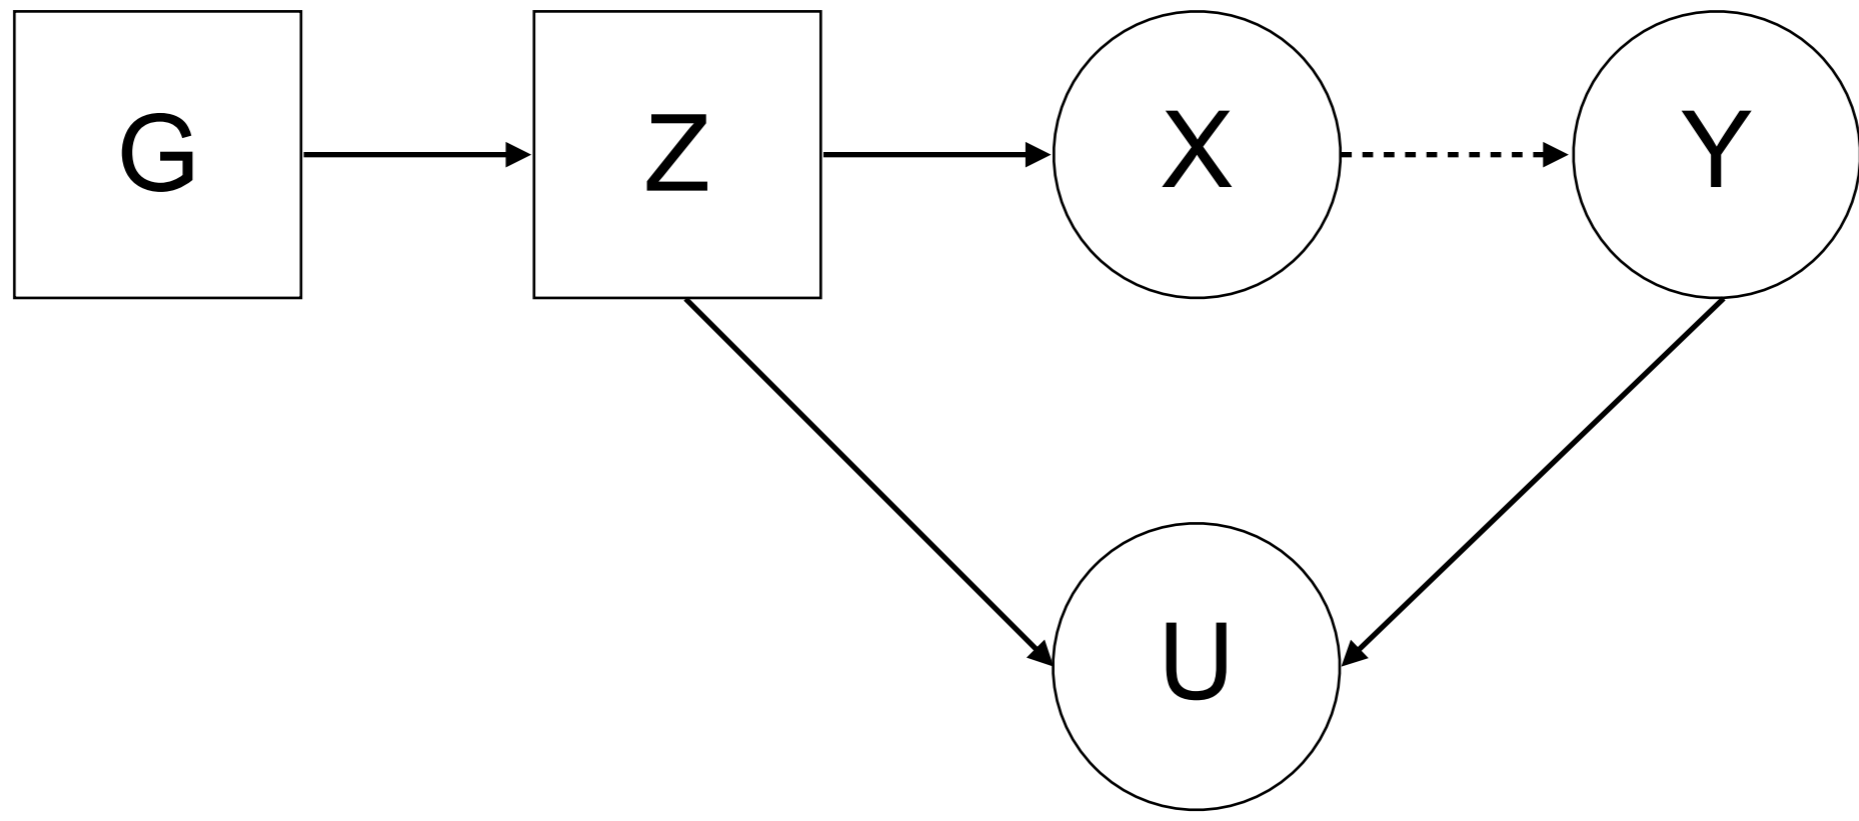

Supplement: Supplementary file [file media-2.pdf]
